# Supplementary material
Source: PubMed Central journal article supplement (PMC2720749)
Supplement: djn340_1.pdf [file djn340_1.pdf]

## Impact of Cancer Version 2 (IOCV2)

Instructions: Given your life as it is now, how do you feel about having had cancer?  
*Please circle the number that best describes how much you agree or disagree with each statement.*

|    |                                                                                           | Strongly Disagree | Disagree | Neutral  | Agree    | Strongly Agree |
|----|-------------------------------------------------------------------------------------------|-------------------|----------|----------|----------|----------------|
| 1. | <b>I do not take my body for granted since the cancer</b>                                 | <b>1</b>          | <b>2</b> | <b>3</b> | <b>4</b> | <b>5</b>       |
| 2. | Having had cancer has made me more concerned about my health                              | 1                 | 2        | 3        | 4        | 5              |
| 3. | <b>I am more aware of physical problems or changes in my body since having had cancer</b> | <b>1</b>          | <b>2</b> | <b>3</b> | <b>4</b> | <b>5</b>       |
| 4. | Having had cancer has made me take better care of myself (my health)                      | 1                 | 2        | 3        | 4        | 5              |
| 5. | <b>I consider myself to be a cancer survivor</b>                                          | <b>1</b>          | <b>2</b> | <b>3</b> | <b>4</b> | <b>5</b>       |
| 6. | I feel a sense of pride or accomplishment from having survived cancer                     | 1                 | 2        | 3        | 4        | 5              |
| 7. | <b>I learned something about myself because of having had cancer</b>                      | <b>1</b>          | <b>2</b> | <b>3</b> | <b>4</b> | <b>5</b>       |
| 8. | I feel that I am a role model to other people with cancer                                 | 1                 | 2        | 3        | 4        | 5              |

|     |                                                                                                 | Strongly Disagree | Disagree | Neutral | Agree | Strongly Agree |
|-----|-------------------------------------------------------------------------------------------------|-------------------|----------|---------|-------|----------------|
| 9.  | <b>Having had cancer makes me feel unsure about my future</b>                                   | 1                 | 2        | 3       | 4     | 5              |
| 10. | I feel like time in my life is running out                                                      | 1                 | 2        | 3       | 4     | 5              |
| 11. | I worry about the cancer coming back or about getting another cancer                            | 1                 | 2        | 3       | 4     | 5              |
| 12. | Having had cancer makes me feel uncertain about my health                                       | 1                 | 2        | 3       | 4     | 5              |
| 13. | I worry about my future                                                                         | 1                 | 2        | 3       | 4     | 5              |
| 14. | New symptoms (aches, pains, getting sick or the flu) make me worry about the cancer coming back | 1                 | 2        | 3       | 4     | 5              |
| 15. | I worry about my health                                                                         | 1                 | 2        | 3       | 4     | 5              |
| 16. | I am concerned that my energy has not returned to what it was before I had cancer               | 1                 | 2        | 3       | 4     | 5              |
| 17. | I am bothered that my body cannot do what it could before having had cancer                     | 1                 | 2        | 3       | 4     | 5              |

|     |                                                                                                        | Strongly Disagree | Disagree | Neutral | Agree | Strongly Agree |
|-----|--------------------------------------------------------------------------------------------------------|-------------------|----------|---------|-------|----------------|
| 18. | <b>Having had cancer has made me feel old</b>                                                          | 1                 | 2        | 3       | 4     | 5              |
| 19. | I worry about how my body looks                                                                        | 1                 | 2        | 3       | 4     | 5              |
| 20. | I feel disfigured                                                                                      | 1                 | 2        | 3       | 4     | 5              |
| 21. | I sometimes wear clothing to cover up parts of my body I don't want others to see                      | 1                 | 2        | 3       | 4     | 5              |
| 22. | I feel a special bond with people with cancer                                                          | 1                 | 2        | 3       | 4     | 5              |
| 23. | Because I had cancer I am more understanding of what other people may feel when they are seriously ill | 1                 | 2        | 3       | 4     | 5              |
| 24. | Having had cancer has made me more willing to help others                                              | 1                 | 2        | 3       | 4     | 5              |
| 25. | I feel that I should give something back to others because I survived cancer                           | 1                 | 2        | 3       | 4     | 5              |
| 26. | I feel guilty today for not having been available to my family when I had cancer                       | 1                 | 2        | 3       | 4     | 5              |
| 27. | I feel like cancer runs my life                                                                        | 1                 | 2        | 3       | 4     | 5              |

|     |                                                                                                                                                                                                                                                                     | Strongly Disagree | Disagree | Neutral | Agree | Strongly Agree |
|-----|---------------------------------------------------------------------------------------------------------------------------------------------------------------------------------------------------------------------------------------------------------------------|-------------------|----------|---------|-------|----------------|
| 28. | <b>Having had cancer has made me feel alone</b>                                                                                                                                                                                                                     | 1                 | 2        | 3       | 4     | 5              |
| 29. | Having had cancer has made me feel like some people (friends, family, co-workers) do not understand me                                                                                                                                                              | 1                 | 2        | 3       | 4     | 5              |
| 30. | Uncertainty about my future affects my decisions to make plans (examples: work, recreation/travel, get married, get involved in relationships, have a family, go to school)                                                                                         | 1                 | 2        | 3       | 4     | 5              |
| 31. | Having had cancer keeps me from doing activities I enjoy (examples: travel, socializing, recreation, time with family)                                                                                                                                              | 1                 | 2        | 3       | 4     | 5              |
| 32. | On-going cancer-related or treatment-related symptoms (for example, bladder or bowel control, lymphedema, hair loss, scars, infertility, premature menopause, lack of energy, impotence/sexual problems, aches, pain or physical discomfort) interfere with my life | 1                 | 2        | 3       | 4     | 5              |
| 33. | Having had cancer turned into a reason to make changes in my life                                                                                                                                                                                                   | 1                 | 2        | 3       | 4     | 5              |

|     |                                                                            | Strongly Disagree | Disagree | Neutral | Agree | Strongly Agree |
|-----|----------------------------------------------------------------------------|-------------------|----------|---------|-------|----------------|
| 34. | <b>Because of cancer I have become better about expressing what I want</b> | 1                 | 2        | 3       | 4     | 5              |
| 35. | Because of cancer I have more confidence in myself                         | 1                 | 2        | 3       | 4     | 5              |
| 36. | Having had cancer has given me direction in life                           | 1                 | 2        | 3       | 4     | 5              |
| 37. | Because of having had cancer I feel that I have more control of my life    | 1                 | 2        | 3       | 4     | 5              |

38. Are you currently married, living together as married, or in a significant relationship?

1 Yes → Please skip to question 42 on the next page

2 No

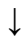

Please answer questions 39-41 only if you are *not* currently married, living together as married, or in a significant relationship.

|     |                                                                                                                                    | Strongly Disagree | Disagree | Neutral | Agree | Strongly Agree |
|-----|------------------------------------------------------------------------------------------------------------------------------------|-------------------|----------|---------|-------|----------------|
| 39. | <b>Uncertainties about my health or my future have made me delay getting married or getting involved in a serious relationship</b> | 1                 | 2        | 3       | 4     | 5              |
| 40. | I wonder how to tell a potential spouse, partner, boyfriend, or girlfriend that I have had cancer                                  | 1                 | 2        | 3       | 4     | 5              |

|     |                                                                            | Strongly Disagree | Disagree | Neutral | Agree | Strongly Agree |
|-----|----------------------------------------------------------------------------|-------------------|----------|---------|-------|----------------|
| 41. | <b>I worry about not having a spouse, partner, boyfriend or girlfriend</b> | 1                 | 2        | 3       | 4     | 5              |

Please skip to question 46 on the next page.

Answer questions 42-45 only if you are *currently married, living together as married, or in a significant relationship*. Otherwise, please skip to question 46 on the next page

|     |                                                                                            | Strongly Disagree | Disagree | Neutral | Agree | Strongly Agree |
|-----|--------------------------------------------------------------------------------------------|-------------------|----------|---------|-------|----------------|
| 42. | <b>I am open and willing to discuss my cancer with my spouse/partner</b>                   | 1                 | 2        | 3       | 4     | 5              |
| 43. | My spouse/partner is open and willing to discuss my cancer with me                         | 1                 | 2        | 3       | 4     | 5              |
| 44. | Uncertainty about my health has created problems in my relationship with my spouse/partner | 1                 | 2        | 3       | 4     | 5              |
| 45. | I worry about my spouse/partner leaving me if I were to become ill again                   | 1                 | 2        | 3       | 4     | 5              |

46. Are you fully retired from paid employment?

1 Yes → Thank you, you have now completed the IOCV2 questionnaire.

2 No

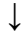

47. Were you employed and earning income at some time during the last 12 months?

0 No → Thank you, you have now completed the IOCV2 questionnaire.

1 Yes

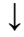

Please answer questions 48-50 only if you were employed and earning income at some time during the last 12 months.

|     |                                                                                  | Strongly Disagree | Disagree | Neutral | Agree | Strongly Agree |
|-----|----------------------------------------------------------------------------------|-------------------|----------|---------|-------|----------------|
| 48. | <b>I am concerned about not being able to work if I were to become ill again</b> | 1                 | 2        | 3       | 4     | 5              |
| 49. | Concerns about losing health insurance keep me in the job I have now             | 1                 | 2        | 3       | 4     | 5              |
| 50. | I worry about being forced to retire or quit work before I am ready              | 1                 | 2        | 3       | 4     | 5              |

Thank you, you have now completed the IOCV2 questionnaire.
