# Supplementary material
Source: PubMed Central journal article supplement (PMC2720749)
Supplement: djn340_2.pdf [file djn340_2.pdf]

## Impact of Cancer Version 2 (IOCv2) Scoring Instructions

The Impact of Cancer Version 2 (IOCv2) is a psychometric scale designed to assess quality of life and other aspects of long-term cancer survivorship. The development of the IOCv2 is described in Crespi et al. (2008). The IOCv2 is a refinement of the original Impact of Cancer (IOC) scale, described by Zebrack and colleagues (2006, 2008).

These instructions describe how the IOCv2 can be scored based on responses from either the original 81-item IOC questionnaire or the shorter IOCv2 instrument. The IOCv2 consists of two higher-order scales, a Positive Impact Scale and a Negative Impact Scale, each with four subscales:

- Positive Impact Scale
  - Altruism and Empathy Subscale
  - Health Awareness Subscale
  - Meaning of Cancer Subscale
  - Positive Self-Evaluation Subscale
- Negative Impact Scale
  - Appearance Concerns Subscale
  - Body Change Concerns Subscale
  - Life Interferences Subscale
  - Worry Subscale,

and three additional subscales measuring employment and relationship impacts:

- Employment Concerns
- Relationship Concerns (Partnered)
- Relationship Concerns (Not Partnered)

Applicability of the last three subscales is determined by responses to screening questions. The other scales and subscales are designed to be applicable to all long-term survivors.

The scales and subscales of the IOCv2 are scored using responses to 47 questionnaire items and three screening questions (items 38, 46 and 47). The items were selected from a longer 81-item questionnaire, described in Zebrack et al. (2006, 2008), based on psychometric evaluation described in Crespi et al. (2008). A respondent indicates his or her agreement with each applicable item on a 5-point scale, where 1 = strongly disagree, 2 = disagree, 3 = neutral, 4 = agree and 5 = strongly agree. Each subscale score is computed as the mean of the responses for the items comprising the subscale. Each higher-order scale score is similarly computed as the mean of the responses for the items comprising that scale. In order to score any subscale or scale, at least half of the items comprising the subscale/scale should be non-missing; otherwise the subscale/scale should be scored as missing. A higher score on a subscale/scale implies stronger endorsement of that content area.

Items 42 and 43 in IOCv2 must be reverse-coded before computing the subscales/scales. To reverse-code, subtract the numeric value of the response from 6 to get the new value, i.e., new value = 6 – old value.

## References

Crespi CM, Ganz PA, Petersen L, Castillo A, Caan B. Refinement and psychometric evaluation of the Impact of Cancer scale. *Journal of the National Cancer Institute* 2008; 100(21):1530-1541.

Zebrack BJ, Ganz PA, Bernaards CA, Petersen L, Abraham L. 2006 Assessing the Impact of Cancer: development of a new instrument for long-term survivors. *Psycho-Oncology* 2006; 15(5): 407-421.

Zebrack BJ, Yi J, Petersen L, Ganz PA. The impact of cancer and quality of life for long-term survivors. *Psycho-Oncology* 2008; 17(3):S30-S31.

| <b>Scale/subscale</b>                 | <b>If administering the 47-item IOCV2 questionnaire, compute the mean of items:</b> | <b>If administering the original 81-item IOC questionnaire, compute the mean of items:</b> |
|---------------------------------------|-------------------------------------------------------------------------------------|--------------------------------------------------------------------------------------------|
| Positive Impact Scale                 | 01, 02, 03, 04, 05, 06, 07, 08, 22, 23, 24, 25, 33, 34, 35, 36, 37                  | 15, 16, 17, 29, 32, 33, 34, 37, 53, 54, 55, 56, 58, 62, 63, 64, 65                         |
| Altruism and Empathy Subscale         | 22, 23, 24, 25                                                                      | 62, 63, 64, 65                                                                             |
| Health Awareness Subscale             | 01, 02, 03, 04                                                                      | 15, 16, 17, 29                                                                             |
| Meaning of Cancer Subscale            | 33, 34, 35, 36, 37                                                                  | 53, 54, 55, 56, 58                                                                         |
| Positive Self-Evaluation Subscale     | 05, 06, 07, 08                                                                      | 32, 33, 34, 37                                                                             |
| Negative Impact Scale                 | 09, 10, 11, 12, 13, 14, 15, 16, 17, 18, 19, 20, 21, 26, 27, 28, 29, 30, 31, 32      | 08, 09, 12, 19, 21, 22, 23, 24, 25, 26, 27, 28, 39, 40, 57, 67, 68, 70, 72, 73             |
| Appearance Concerns Subscale          | 19, 20, 21                                                                          | 26, 27, 28                                                                                 |
| Body Change Concerns Subscale         | 16, 17, 18                                                                          | 24, 25, 39                                                                                 |
| Life Interferences Subscale           | 26, 27, 28, 29, 30, 31, 32                                                          | 40, 57, 67, 68, 70, 72, 73                                                                 |
| Worry Subscale                        | 09, 10, 11, 12, 13, 14, 15                                                          | 08, 09, 12, 19, 21, 22, 23                                                                 |
| Employment Concerns                   | 48, 49, 50                                                                          | 01, 02, 03                                                                                 |
| Relationship Concerns (Not Partnered) | 39, 40, 41                                                                          | 74, 75, 77                                                                                 |
| Relationship Concerns (Partnered)     | 42*, 43*, 44, 45                                                                    | 78*, 79*, 80, 81                                                                           |

*\*Reverse-code these items (new value = 6 – old value) before computing the mean*

## IOCV2 Item Descriptions

Note: This list does not include the employment and relationship screening questions (IOCV2 items 38, 46 and 47).

| Item number in 47-item IOCV2 questionnaire | Item number in 81-item IOC questionnaire | Item description                                                                                       |
|--------------------------------------------|------------------------------------------|--------------------------------------------------------------------------------------------------------|
| 01                                         | 15                                       | I do not take my body for granted since the cancer                                                     |
| 02                                         | 16                                       | Having had cancer has made me more concerned about my health                                           |
| 03                                         | 17                                       | I am more aware of physical problems or changes in my body since having had cancer                     |
| 04                                         | 29                                       | Having had cancer has made me take better care of myself (my health)                                   |
| 05                                         | 32                                       | I consider myself to be a cancer survivor                                                              |
| 06                                         | 33                                       | I feel a sense of pride or accomplishment from surviving cancer                                        |
| 07                                         | 34                                       | I learned something about myself because of having had cancer                                          |
| 08                                         | 37                                       | I feel that I am a role model to other people with cancer                                              |
| 09                                         | 08                                       | Having had cancer makes me feel unsure about my future                                                 |
| 10                                         | 12                                       | I feel like time in my life is running out                                                             |
| 11                                         | 21                                       | I worry about the cancer coming back or about getting another cancer                                   |
| 12                                         | 23                                       | Having had cancer makes me feel uncertain about my health                                              |
| 13                                         | 09                                       | I worry about my future                                                                                |
| 14                                         | 22                                       | New symptoms (aches, pains, getting sick or the flu) make me worry about the cancer coming back        |
| 15                                         | 19                                       | I worry about my health                                                                                |
| 16                                         | 24                                       | I am concerned that my energy has not returned to what it was before I had cancer                      |
| 17                                         | 25                                       | I am bothered that my body cannot do what it could before having had cancer                            |
| 18                                         | 39                                       | Having had cancer has made me feel old                                                                 |
| 19                                         | 26                                       | I worry about how my body looks                                                                        |
| 20                                         | 27                                       | I feel disfigured                                                                                      |
| 21                                         | 28                                       | I sometimes wear clothing to cover up parts of my body I don't want others to see                      |
| 22                                         | 62                                       | I feel a special bond with people with cancer                                                          |
| 23                                         | 63                                       | Because I had cancer I am more understanding of what other people may feel when they are seriously ill |
| 24                                         | 64                                       | Having had cancer has made me more willing to help others                                              |
| 25                                         | 65                                       | I feel that I should give something back to others because I survived cancer                           |
| 26                                         | 40                                       | I feel guilty today for not having been available to my family when I had cancer                       |

|    |    |                                                                                                                                                                                                                                                                     |
|----|----|---------------------------------------------------------------------------------------------------------------------------------------------------------------------------------------------------------------------------------------------------------------------|
| 27 | 57 | I feel like cancer runs my life                                                                                                                                                                                                                                     |
| 28 | 67 | Having had cancer has made me feel alone                                                                                                                                                                                                                            |
| 29 | 68 | Having had cancer has made me feel like some people (friends, family, co-workers) do not understand me                                                                                                                                                              |
| 30 | 70 | Uncertainty about my future affects my decisions to make plans (examples: work, recreation/travel, get married, get involved in relationships, have a family, go to school)                                                                                         |
| 31 | 72 | Having had cancer keeps me from doing activities I enjoy (examples: travel, socializing, recreation, time with family)                                                                                                                                              |
| 32 | 73 | On-going cancer-related or treatment-related symptoms (for example, bladder or bowel control, lymphedema, hair loss, scars, infertility, premature menopause, lack of energy, impotence/sexual problems, aches, pain or physical discomfort) interfere with my life |
| 33 | 53 | Having had cancer turned into a reason to make changes in my life                                                                                                                                                                                                   |
| 34 | 54 | Because of cancer I have become better about expressing what I want                                                                                                                                                                                                 |
| 35 | 55 | Because of cancer I have more confidence in myself                                                                                                                                                                                                                  |
| 36 | 56 | Having had cancer has given me direction in life                                                                                                                                                                                                                    |
| 37 | 58 | Because of having had cancer I feel that I have more control of my life                                                                                                                                                                                             |
| 39 | 74 | Uncertainties about my health or my future have made me delay getting married or getting involved in a serious relationship                                                                                                                                         |
| 40 | 75 | I wonder how to tell a potential spouse, partner, boyfriend or girlfriend that I have had cancer                                                                                                                                                                    |
| 41 | 77 | I worry about not having a spouse, partner, boyfriend or girlfriend                                                                                                                                                                                                 |
| 42 | 78 | I am open and willing to discuss my cancer with my spouse/partner                                                                                                                                                                                                   |
| 43 | 79 | My spouse/partner is open and willing to discuss my cancer with me                                                                                                                                                                                                  |
| 44 | 80 | Uncertainty about my health has created problems in my relationship with my spouse/partner                                                                                                                                                                          |
| 45 | 81 | I worry about my spouse/partner leaving me if I were to become ill again                                                                                                                                                                                            |
| 48 | 01 | I am concerned about not being able to work if I become ill again                                                                                                                                                                                                   |
| 49 | 02 | Concerns about losing health insurance keep me in the job I have now                                                                                                                                                                                                |
| 50 | 03 | I worry about being forced to retire or quit work before I am ready                                                                                                                                                                                                 |
